# Supplementary material for: Genetic analysis of the Trichuris muris-induced model of colitis reveals QTL overlap and a novel gene cluster for establishing colonic inflammation
Source: PubMed Central journal article supplement (PMC3621453; doi:10.1186/1471-2164-14-127), 2013-02-26
Supplement: 1471-2164-14-127-S1.pdf [file 1471-2164-14-127-S1.pdf]

Table S1. Primer sequences for qPCR-amplified genes.

---

|                      |                         |                        |
|----------------------|-------------------------|------------------------|
| <i>Actb</i>          | GGCTGTATTCCCCTCCATCG    | CAGTTGGTAACAATGCCATGT  |
| <i>Vav3</i>          | GCCACACTCCATCAATCTG     | GGTCAAATGCCTCAAAAAGTTC |
| <i>FcgR1</i>         | AGAAGCGATGGCGTGATGA     | TTCAGGCTGCTCGGGTCCAC   |
| <i>Ptpn22_distal</i> | AGCCGTGCAAACCTTCTTCTACT | CTGAACACGTTCTGTAGGCTTG |
| <i>Vcam1</i>         | GCCTCAACGGTACTTTGGATAC  | TCTCCATGAGAACAATGGTGAC |
| <i>Hmgcs2</i>        | ATGATCTTCCACACACCCTTTT  | GCCTTCAAAGAGCCTTGTCTA  |
| <i>Slc22a15</i>      | CTCTGCCCTTCATCGTGT      | TCACTGCTGACCTTGTCC     |
| <i>S100a10</i>       | GCAAACCTGTGAAACGTA      | CAGCTCTTCCAAGGACTG     |
| <i>Ctss</i>          | TAAAGGGCCTGTCTCTGT      | TGCCATCCGAATGTATCC     |

---

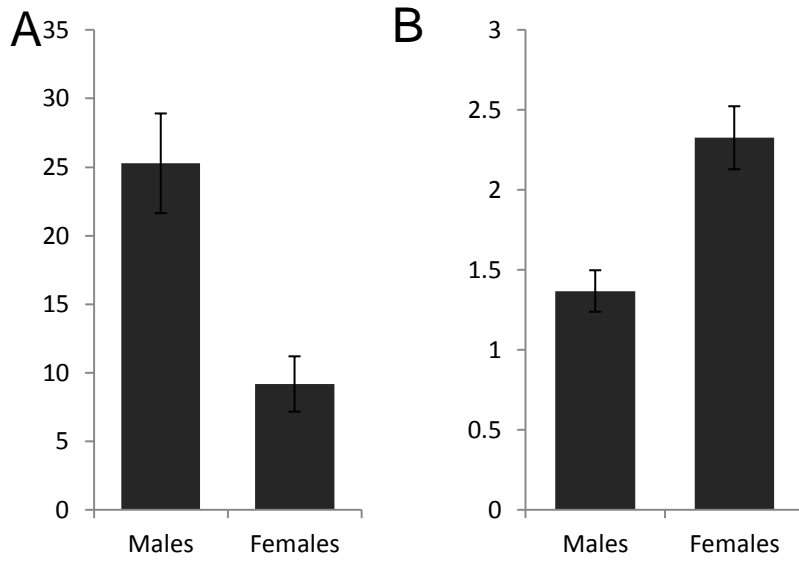

Figure S1

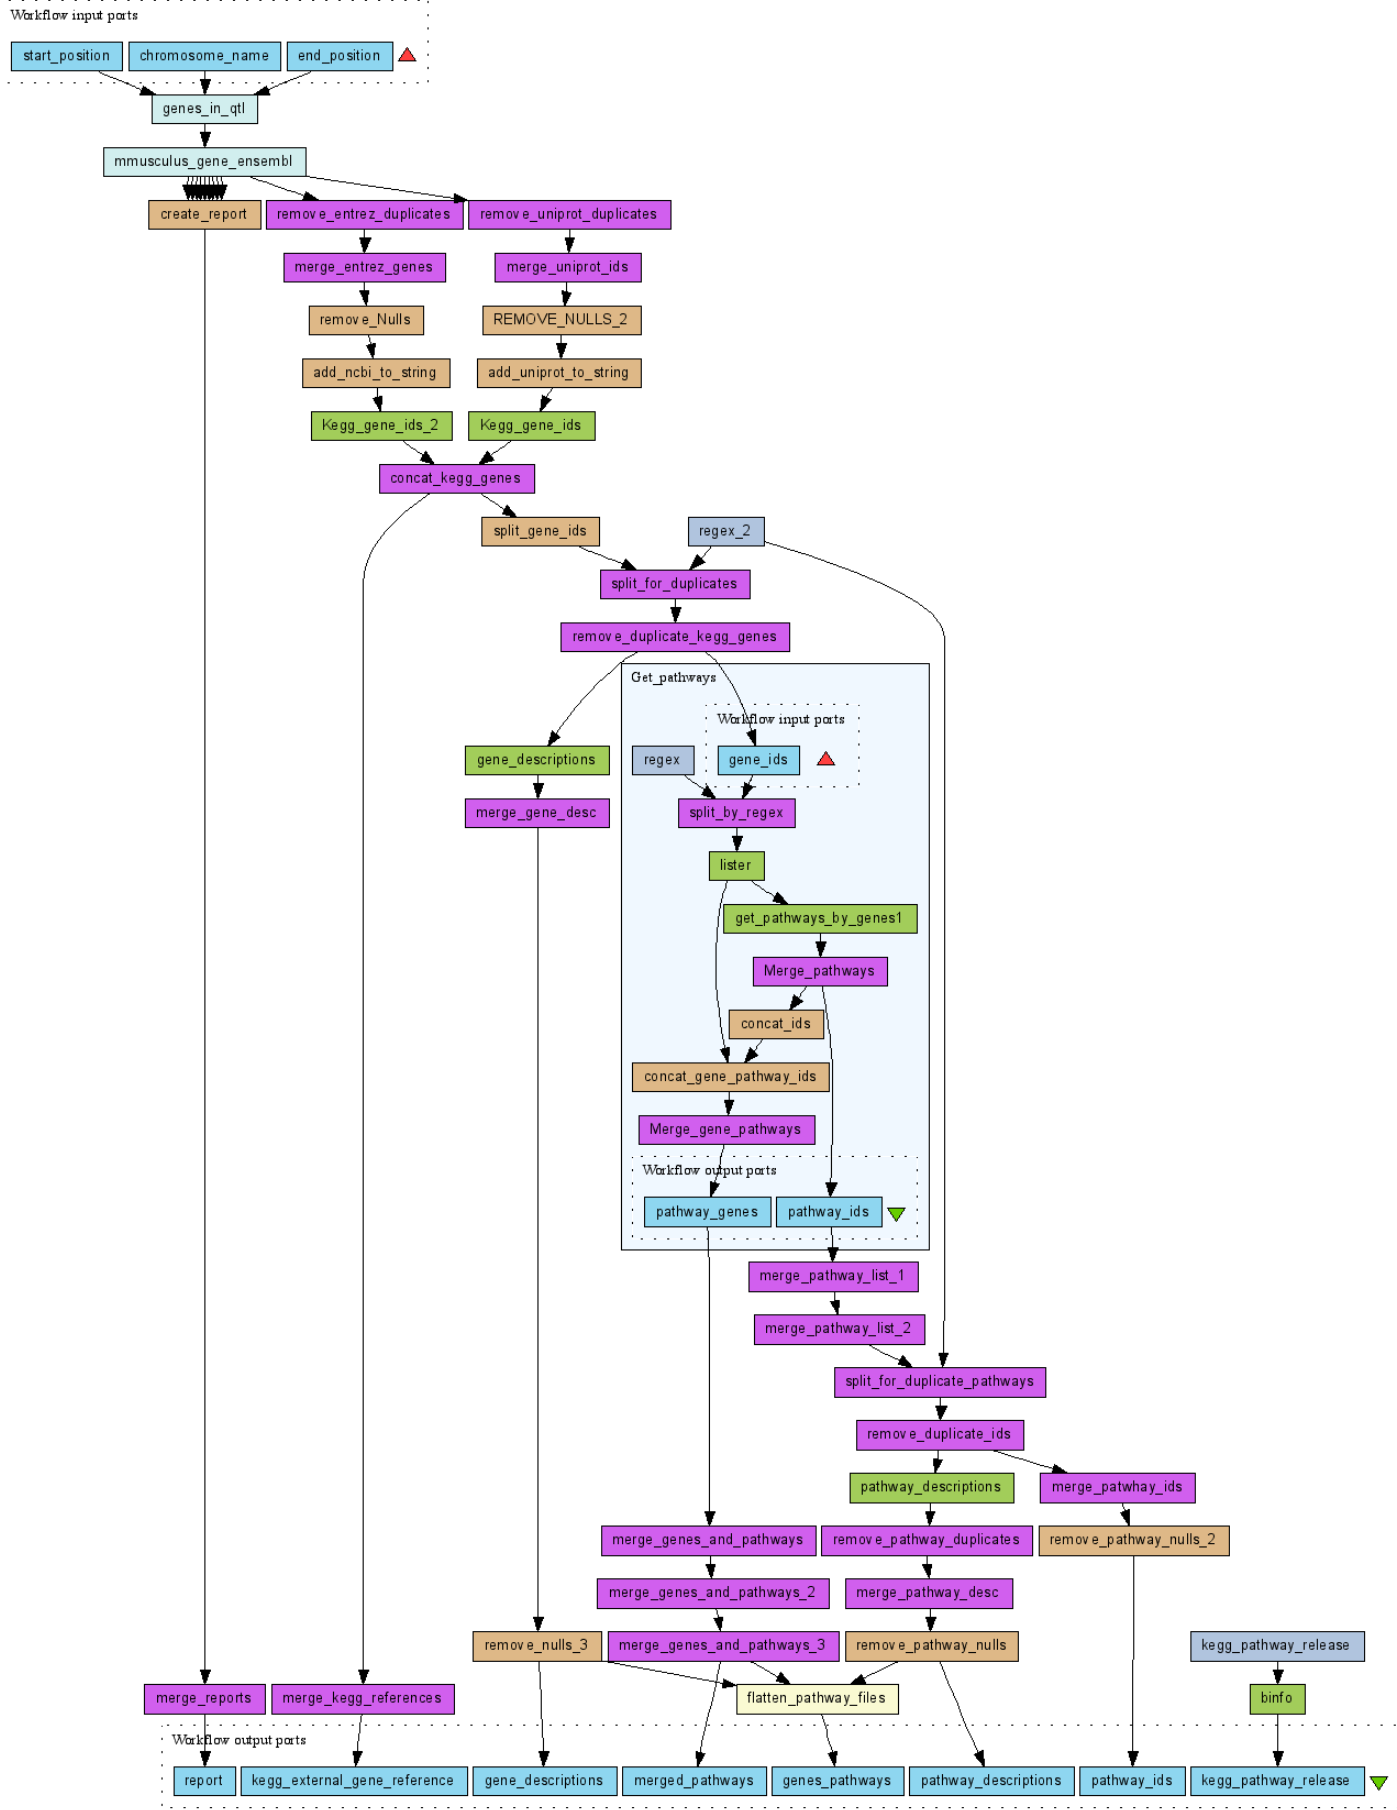

Figure S2

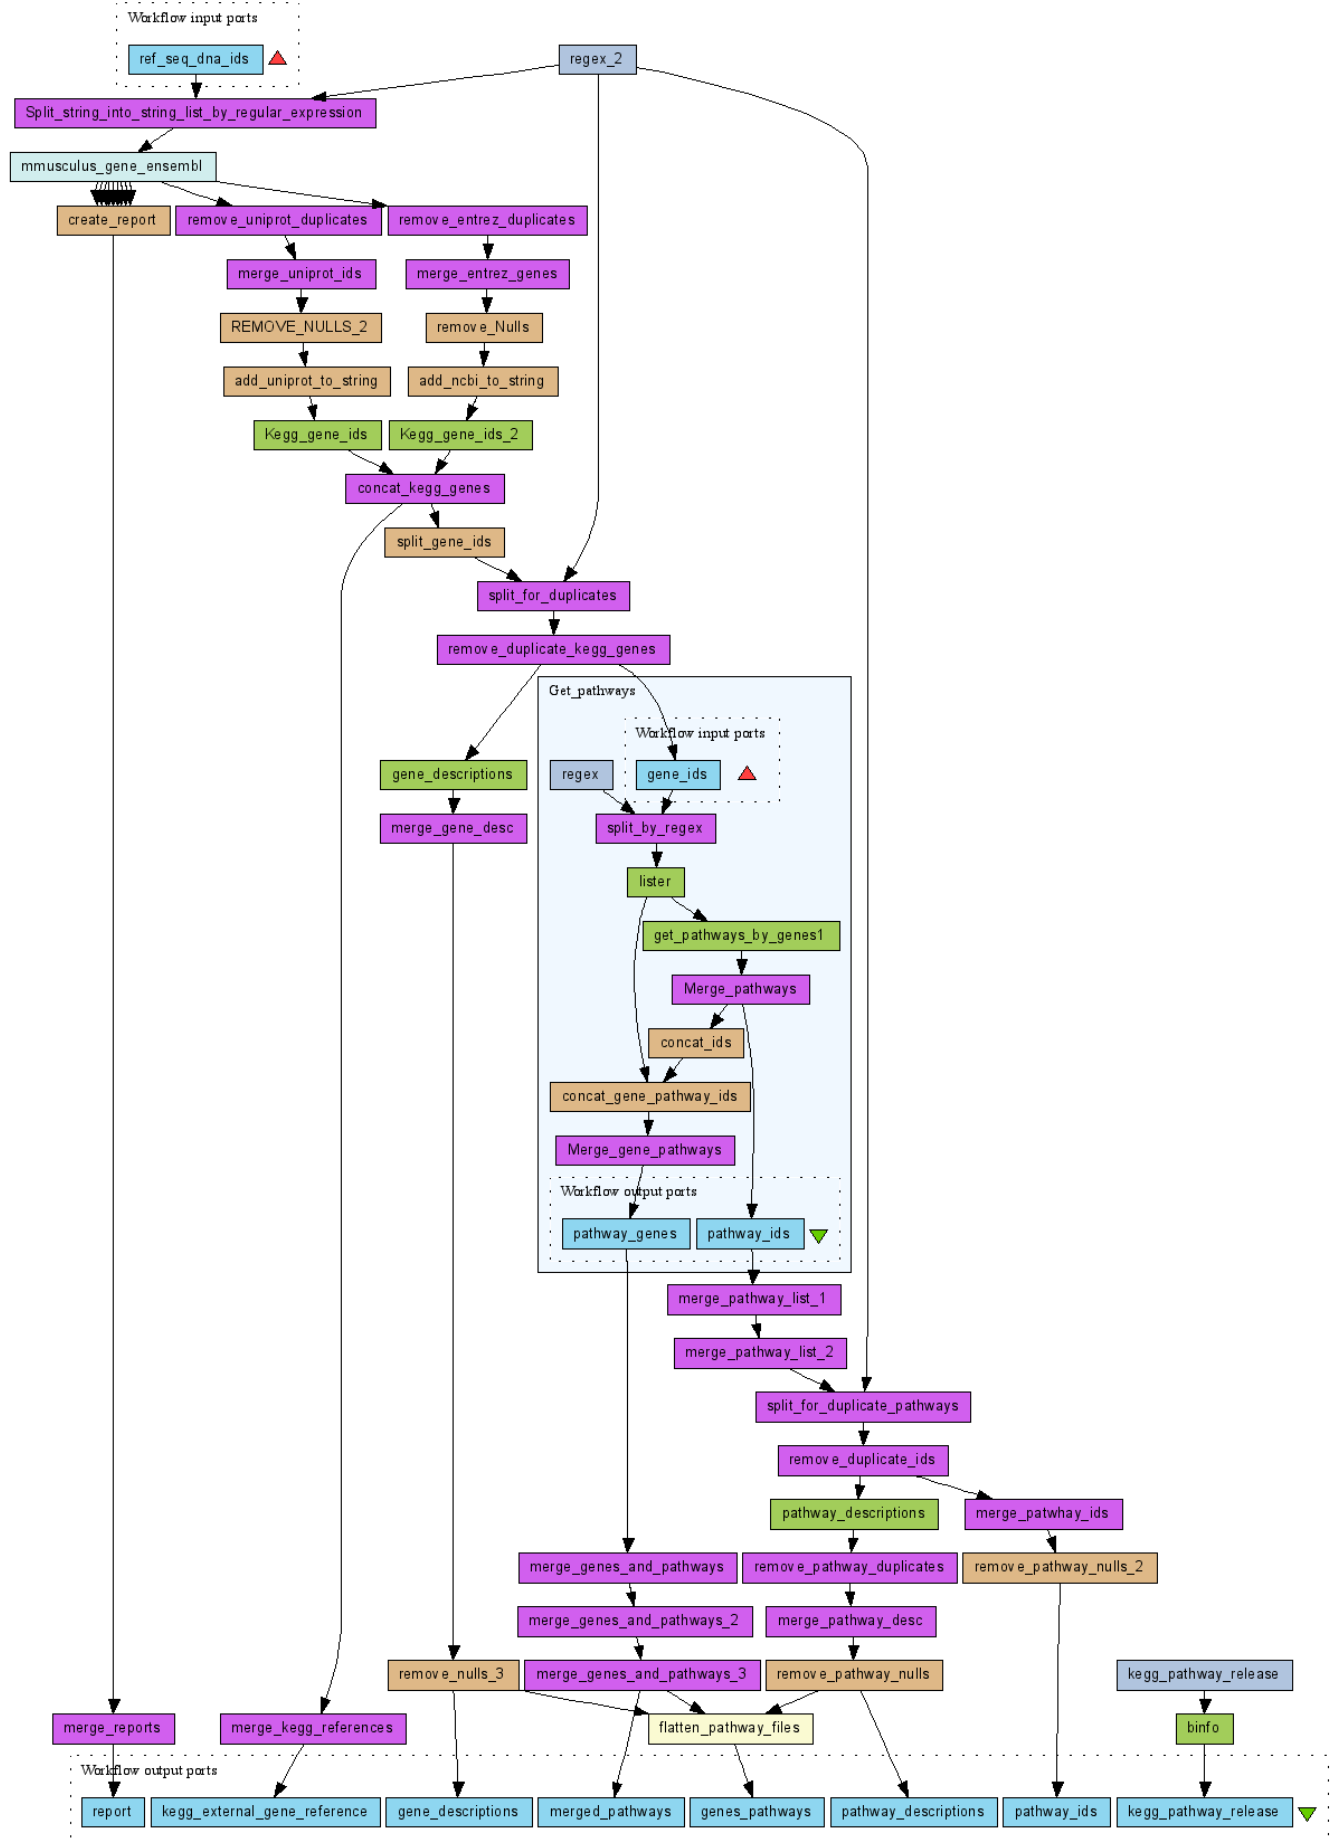

Figure S3

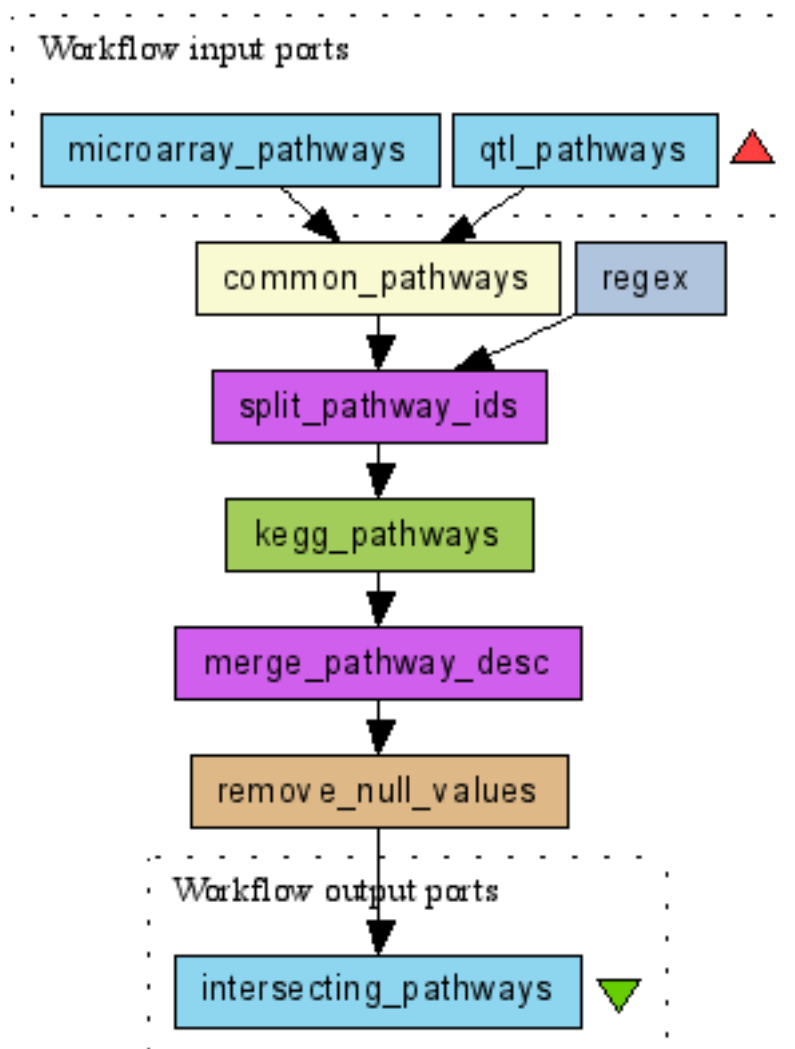

Figure S4

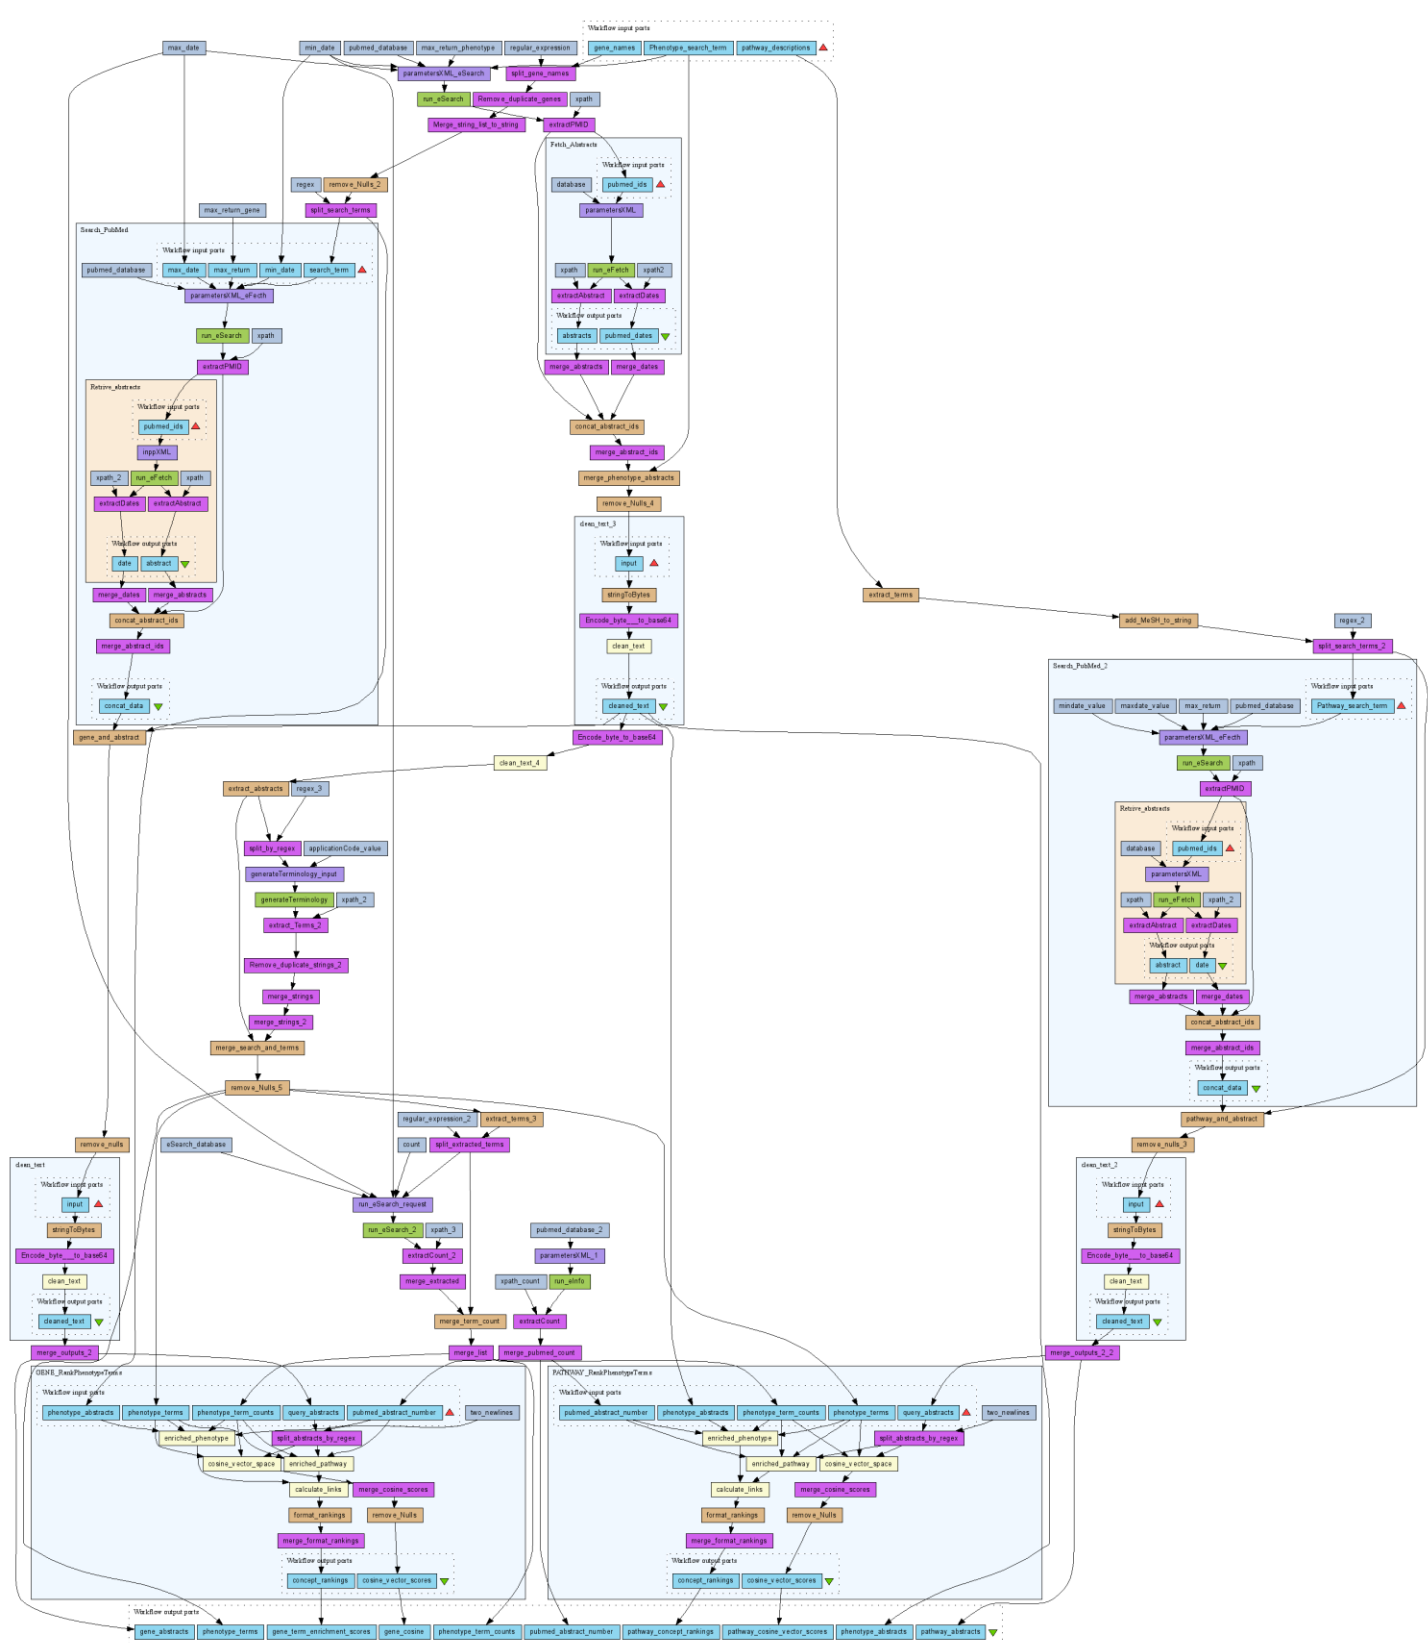

Figure S5
